# Supplementary material
Source: MDPI journal article supplement (https://www.mdpi.com/2071-1050/12/2/565)
Supplement: s1 [file s1]

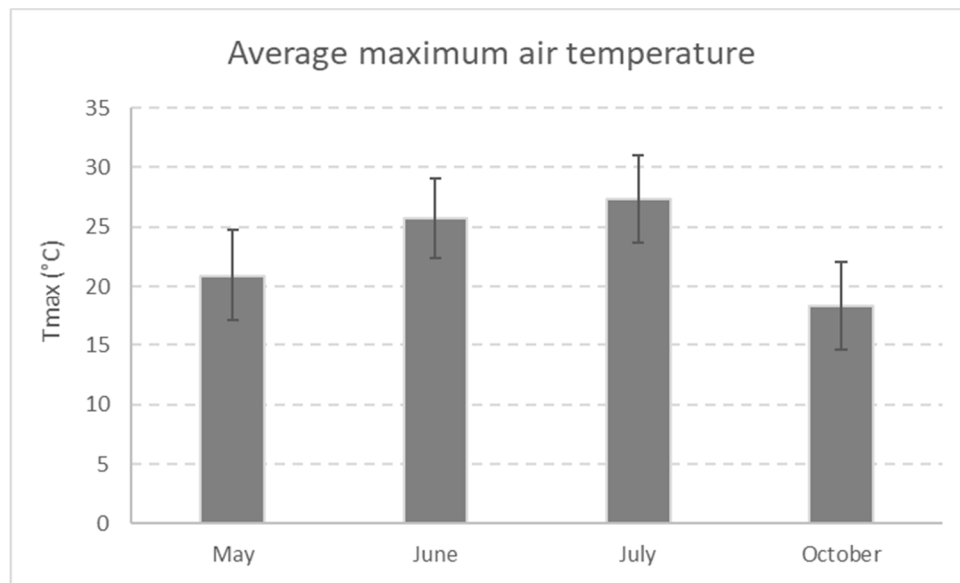

**Figure S1.** Average maximum monthly air temperature ( $T_{\max}$ , °C) in the Experimental Garden of the Department of Environmental Biology during the experimental period of the year 2017.  $T_{\max}$  is used as indicator of temperature stress during the summer season. Data from the ClimateNetwork (Climate Consulting s.r.l.) station located within Sapienza University of Rome, courtesy of Prof. A.M. Siano.
